# Supplementary material for: Fluorescent nanodiamond immunosensors for clinical diagnostics of tuberculosis
Source: Royal Society of Chemistry journal article supplement (doi:10.1039/d3tb03038e), 2024-01-01
Supplement: d3tb03038e1.pdf [file d3tb03038e1.pdf]

## Supplementary Information

# Fluorescent nanodiamond immunosensors for clinical diagnostics of tuberculosis

Trong-Nghia Le,<sup>a</sup> Mhikee Janella N. Descanzo,<sup>b</sup> Wesley W.-W. Hsiao,<sup>c</sup> Po-Chi Soo,<sup>de</sup> Wen-Ping Peng<sup>b</sup> and Huan-Cheng Chang<sup>\*acf</sup>

<sup>a</sup> *Institute of Atomic and Molecular Sciences, Academia Sinica, Taipei 106, Taiwan*

<sup>b</sup> *Department of Physics, National Dong Hwa University, Shoufeng, Hualien 97401, Taiwan*

<sup>c</sup> *Department of Chemical Engineering, National Taiwan University of Science and Technology, Taipei 106, Taiwan*

<sup>d</sup> *Department of Laboratory Medicine and Biotechnology, Tzu Chi University, Hualien 97004, Taiwan*

<sup>e</sup> *Department of Internal Medicine, Buddhist Tzu Chi General Hospital and Tzu Chi University, Hualien 97004, Taiwan*

<sup>f</sup> *Department of Chemistry, National Taiwan Normal University, Taipei 106, Taiwan*

\* *Email: hchang@gate.sinica.edu.tw*

## Table of Contents

|                                                                                                  |    |
|--------------------------------------------------------------------------------------------------|----|
| <b>Figure S1.</b> Experimental layout of the SELFIA reader.....                                  | S2 |
| <b>Figure S2.</b> FTIR spectra of bare FNDs and antibody-conjugated FNDs.....                    | S2 |
| <b>Figure S3.</b> Illustration of direct SELFIA .....                                            | S3 |
| <b>Figure S4.</b> Optimization of immunoreagent preparation and incubation time .....            | S4 |
| <b>Figure S5.</b> Optimization of running and washing buffers.....                               | S5 |
| <b>Figure S6.</b> Validation of narrow channel strips using DV1 non-structural protein NS1 ..... | S6 |
| <b>Figure S7.</b> Assays of ESAT6 in clinical culture mediums.....                               | S7 |
| <b>Table S1.</b> Performance comparison between competitive SELFIA and other assays .....        | S8 |
| <b>References</b> .....                                                                          | S9 |

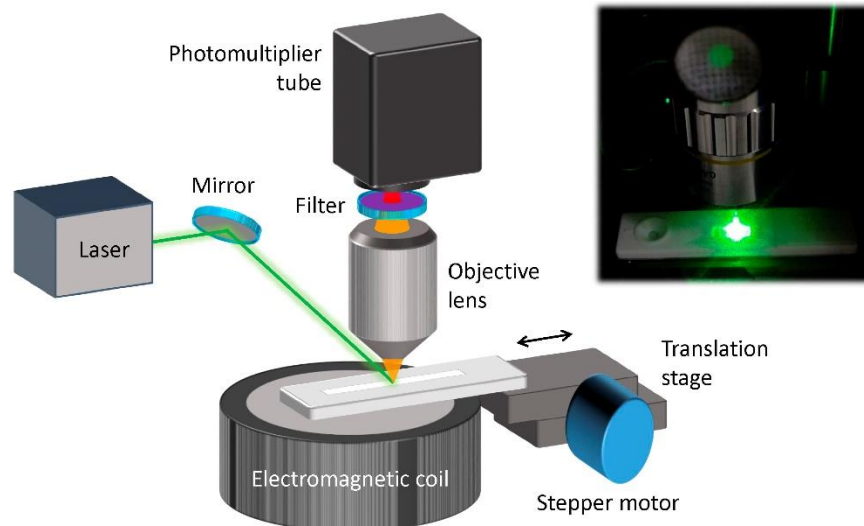

**Figure S1.** Experimental layout of the SELFIA reader. Inset: Photograph of the excitation region when the instrument is in operation.

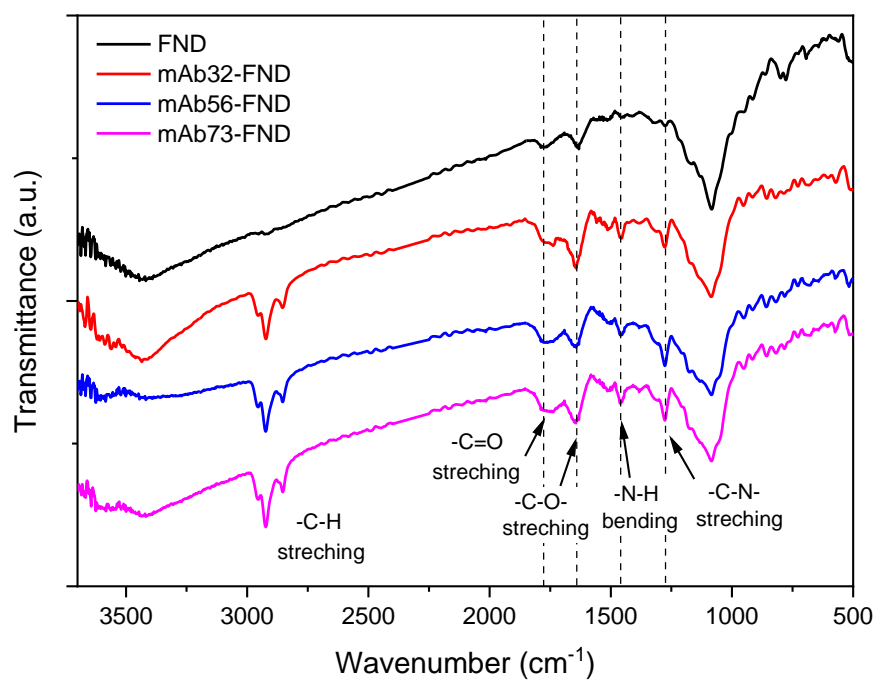

**Figure S2.** Fourier-transform infrared (FTIR) spectra of FNDs before and after conjugation with antibodies (mAb32, mAb56, and mAb73). The spectra are shifted vertically for clarity.

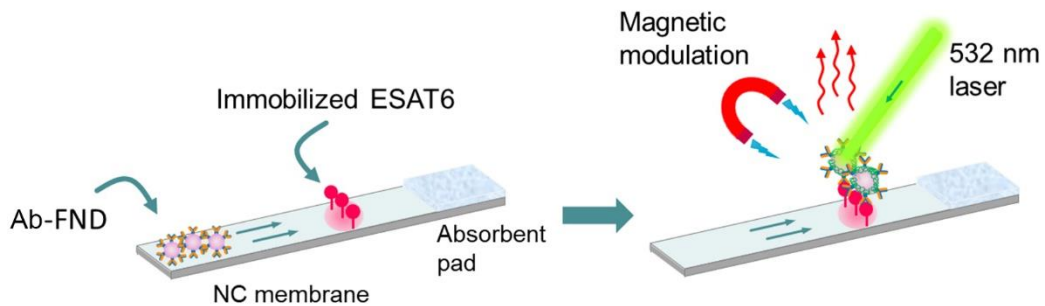

**Figure S3.** Illustration of direct SELFIA. An excess amount of ESAT6 is first immobilized on a nitrocellulose membrane strip. Next, a known amount of antibody-conjugated FNDs is added to the strip, followed by fluorescent intensity measurement by using the SELFIA platform after running the sample solution for 30 min.

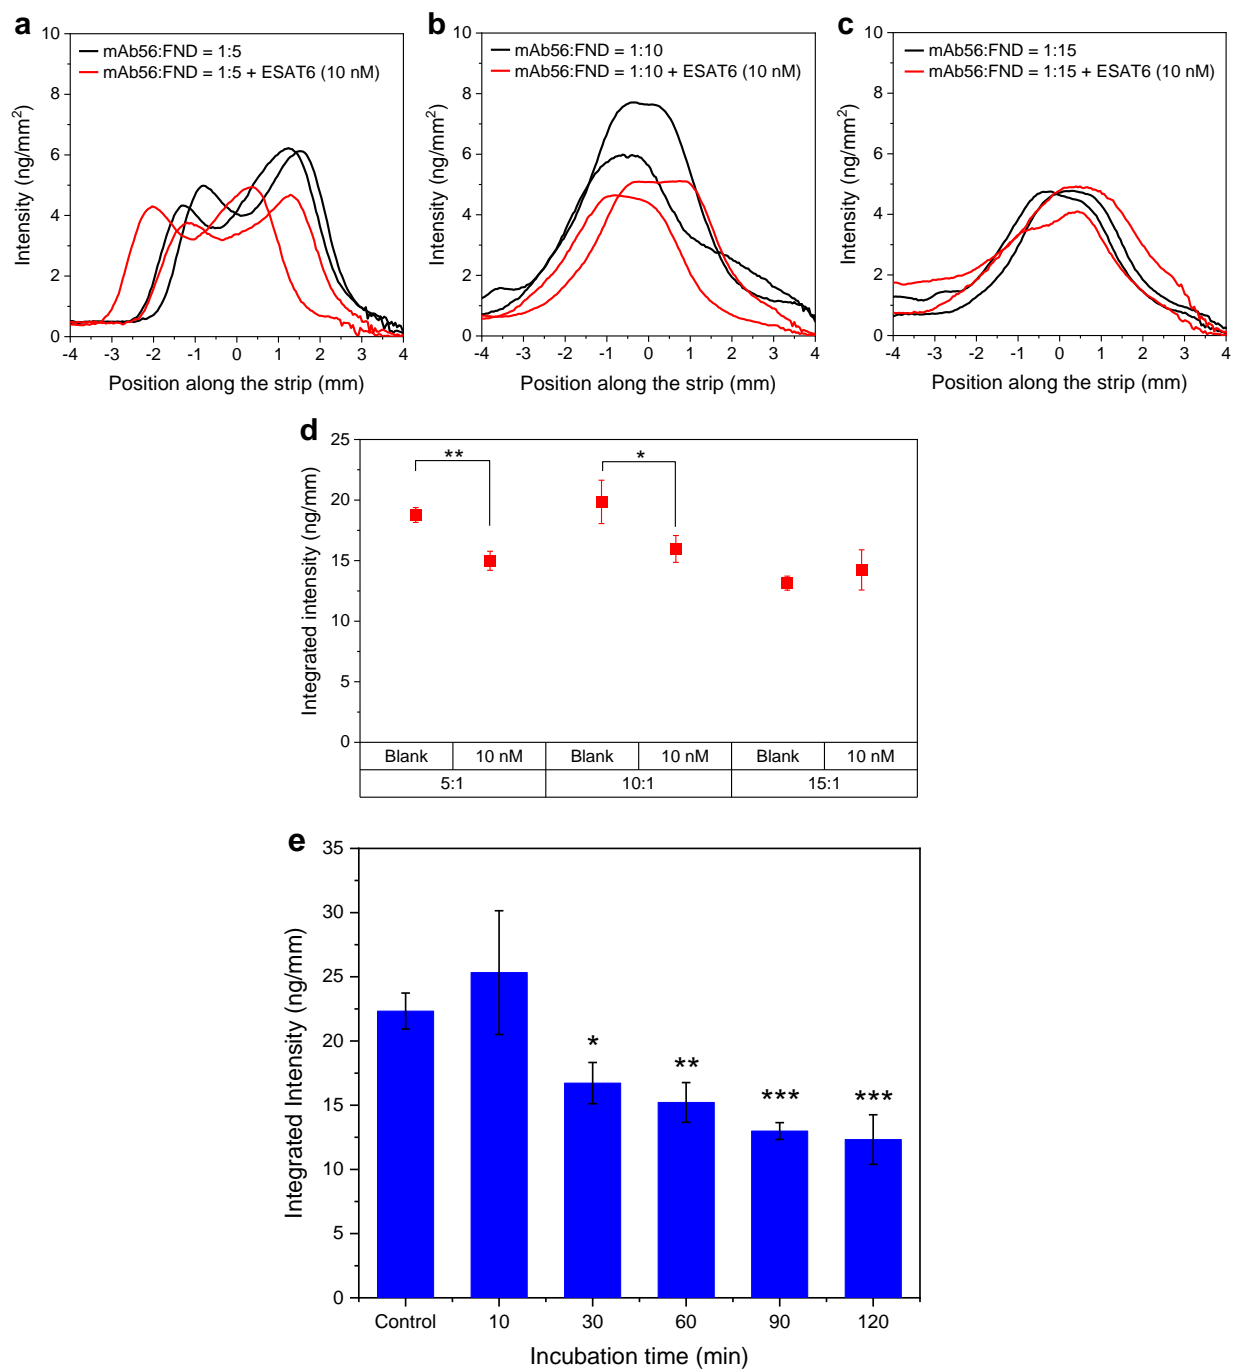

**Figure S4.** (a-c) Fluorescence intensity line profiles and (d) integrated fluorescence intensities of competitive SELFIA for ESAT6 with mAb56-FNDs prepared at different weight ratios of mAb56:FND = 1:5 (a), 1:10 (b), 1:15 (c). (e) Optimization of the incubation time of mAb56-FND with ESAT6. The control consisted of PBS, and the sample solution was 10 nM ESAT6. Data are presented as mean  $\pm$  standard deviation,  $n = 3$  and  $*p < 0.05$ ,  $**p < 0.01$ ,  $***p < 0.001$ .

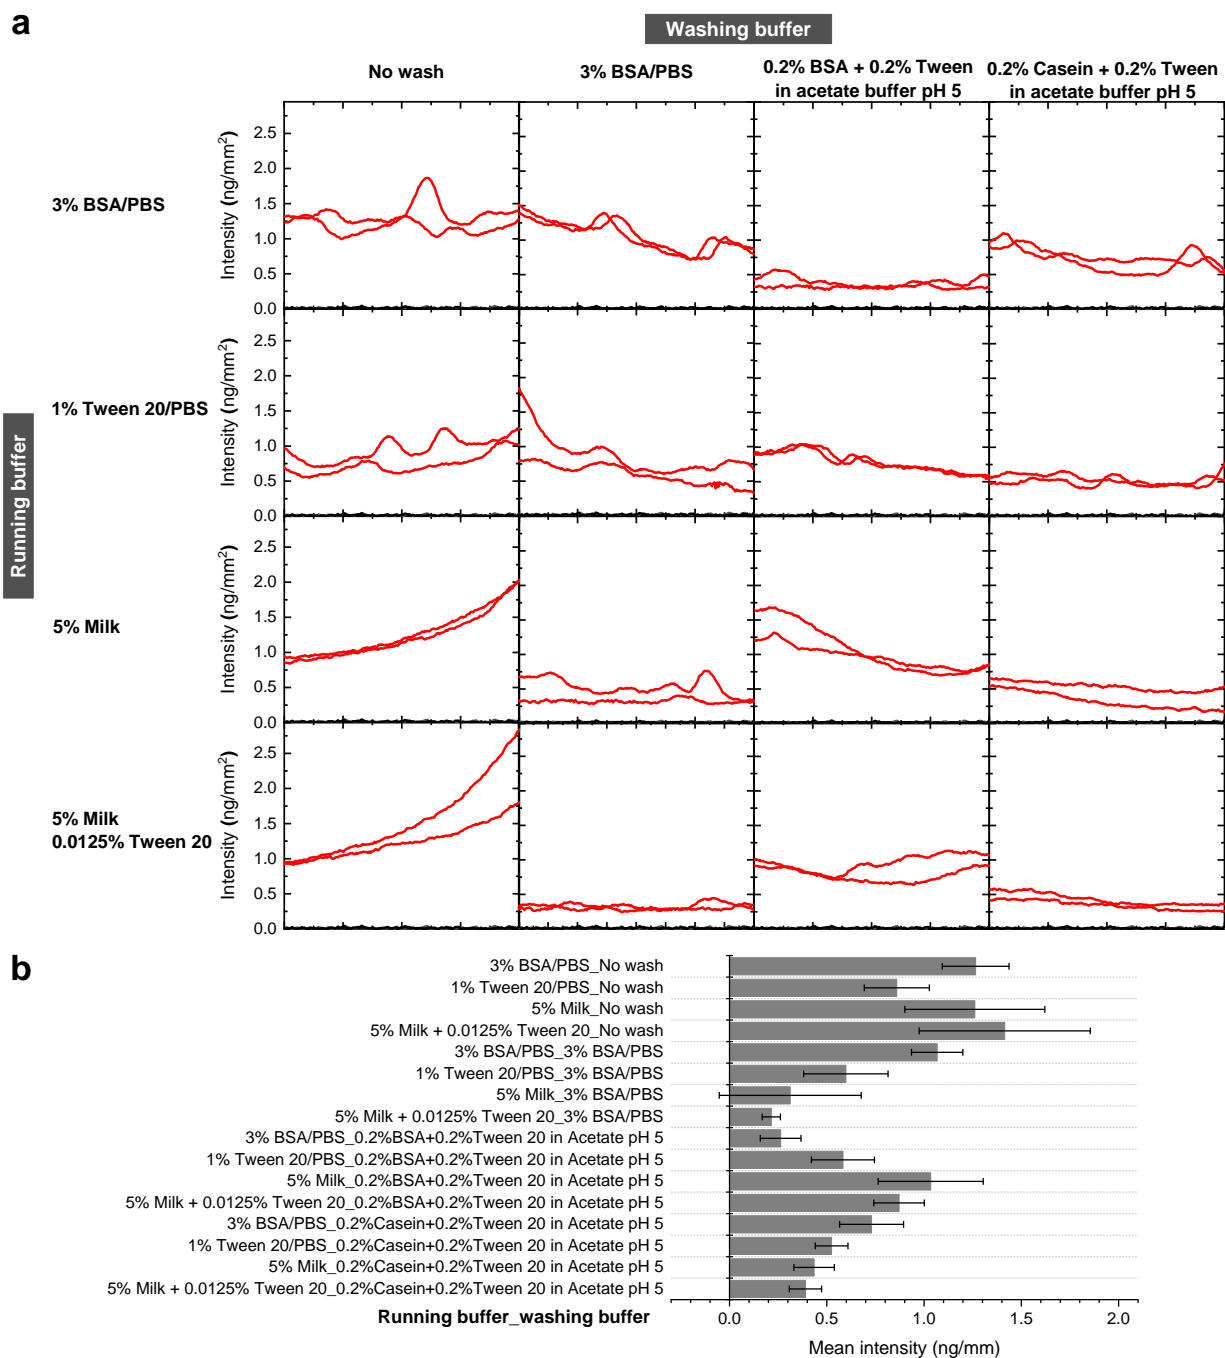

**Figure S5.** Optimization of the running and washing buffers for competitive SELFIA of ESAT6. (a) Fluorescent intensity profiles and (b) mean intensities of mAb56-FNDs flowing through the nitrocellulose membrane strips using different combinations of running buffer and washing buffer. Data are presented as mean  $\pm$  standard deviation,  $n = 2$ .

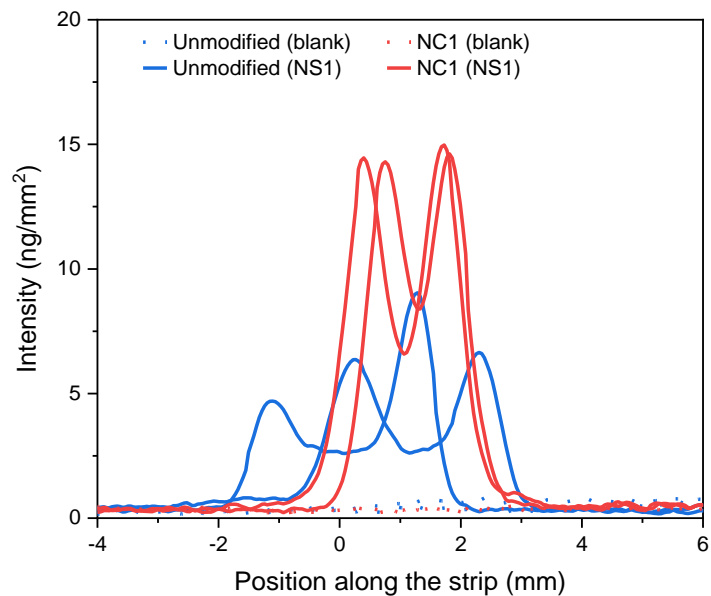

**Figure S6.** Validation of narrow channel strips using the non-structural protein NS1 of the DV1 Dengue virus at the concentrations of 0 (blank) and 10  $\mu\text{g}/\text{mL}$  (NS1).

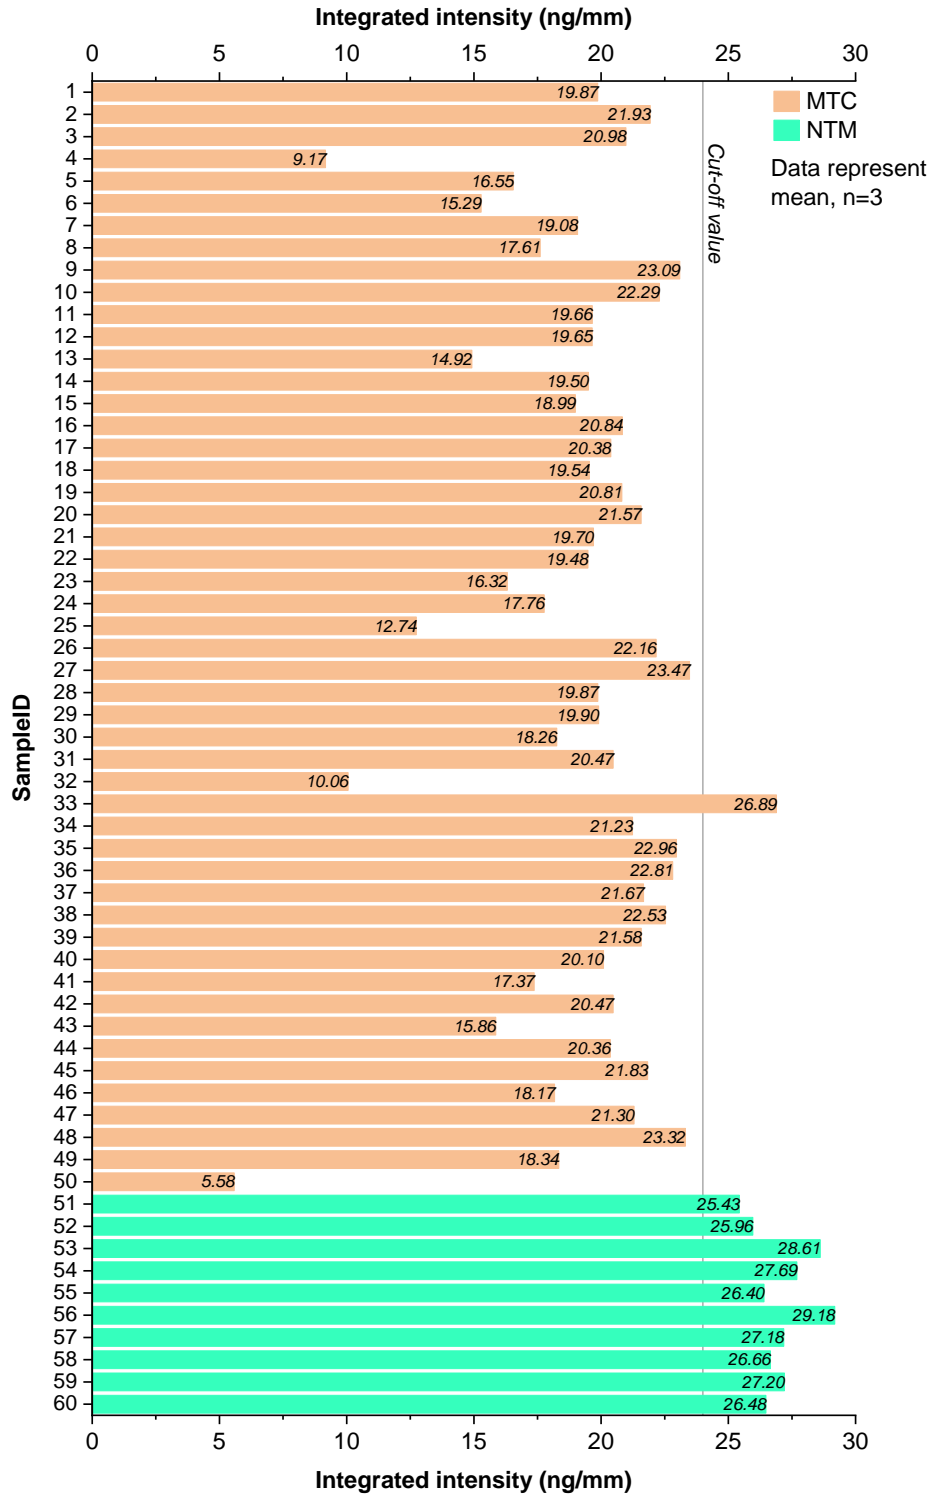

**Figure S7.** Detection of ESAT6 in culture mediums of 60 clinical samples using competitive SELFIA. With the cut-off value set at 24.0 ng/mm (denoted by the vertical line), the sensitivity and specificity of the assays were 98% and 100%, respectively.

**Table S1.** Performance comparison between competitive SELFIA and other reported assays for ESAT6 from *Mycobacterium tuberculosis*.

| <b>Method</b>                            | <b>LOD</b>    | <b>Sensitivity</b>              | <b>Specificity</b> | <b>Assay time</b> | <b>Ref.</b>  |
|------------------------------------------|---------------|---------------------------------|--------------------|-------------------|--------------|
| Competitive SELFIA                       | 0.02<br>ng/mL | 98% (sputum)                    | 100%               | 50 min            | This<br>work |
| Aptamer-based qPCR                       | 2.56<br>nM    | 50% (serum)                     | 91.7%              | 4 h               | [1]          |
| Immunochromatographic<br>strips          | 6<br>ng/mL    | 100% (sputum)<br>34.1% (plasma) | 91.2%              | 10 min            | [2]          |
| NanoDisk-MS                              | 197<br>pM     | 91.6% (blood)                   | 95.8%              | 2.5 h             | [3]          |
| ELSIA                                    | 60<br>pg/mL   | 95.4% (sputum)                  | 100%               | 6 h               | [4]          |
| Electrochemiluminescence<br>immunoassays | -             | 65% (urine)<br>46% (serum)      | 97%                | -                 | [5]          |
| Electrochemical<br>immunosensors         | 1.5<br>ng/mL  | 100% (sputum)                   | 100%               | 2 h               | [6]          |
| Electrochemical<br>immunosensors         | 1.5<br>ng/mL  | 100% (sputum)                   | 91.7%              | 2 h               | [7]          |
| Electrochemical<br>immunosensors         | 1<br>ng/mL    | -                               | -                  | -                 | [8]          |
| Electrochemical<br>immunosensors         | 0.15<br>ng/mL | -                               | -                  | 6 h               | [9]          |



## References

- [1] B. Kil, E. Kim, M. Kang, J. Jeon, Y. Chang, C. L. Chang and C. Ban, *Sens. Actuators. B Chem.*, 2023, **381**, 133427.
- [2] X. Wu, Y. Wang, T. Weng, C. Hu, F. X. C. Wang, Z. Wu, D. Yu, H. Lu and H. Yao, *Medicine*, 2017, **96**, e9350.
- [3] C. Liu, C. J. Lyon, Y. Bu, Z. Deng, E. Walters, Y. Li, L. Zhang, A. C. Hesselring, E. A. Graviss and Y. Hu, *Clin. Chem.*, 2018, **64**, 791.
- [4] T. T. Feng, C. M. Shou, L. Shen, Y. Qian, Z. G. Wu, J. Fan, Y. Z. Zhang, Y. W. Tang, N. P. Wu, H. Z. Lu and H. P. Yao, *Int. J. Tuberc. Lung Dis.*, 2011, **15**, 804.
- [5] T. Broger, M. Tsionksy, A. Mathew, T. L. Lowary, A. Pinter, T. Plisova, D. Bartlett, S. Barbero, C. M. Denkinge, E. Moreau, K. Katsuragi, M. Kawasaki, P. Nahid and G.B. Sigal, *PLoS One*, 2019, **14**, e0215443.
- [6] U. Z. M. Azmi, N. A. Yusof, J. Abdullah, F. Mohammad, S. A. A. Ahmad, S. Suraiya, N. H. A. Raston, F. N. M. Faudzi, S. K. Khiste and H. A. Al-Lohedan, *Nanomaterials* 2021, **11**, 2446.
- [7] U. Z. Mohd Azmi, N. A. Yusof, J. Abdullah, S. A. Alang Ahmad, F. N. Mohd Faudzi, N. H. Ahmad Raston, S. Suraiya, P. S. Ong, D. Krishnan and N. K. Sahar, *Microchim. Acta*, 2021, **188**, 20.
- [8] R. A. Omar, N. Verma and P. K. Arora, *Front. Immunol.*, 2021, **12**, 653853.
- [9] N. Mohd Bakhori, N. A. Yusof, J. Abdullah, H. Wasoh, S. K. Ab Rahman and S. F. Abd Rahman, *Materials*, 2020, **13**, 149.
